# Supplementary material for: Artichoke Biorefinery: From Food to Advanced Technological Applications
Source: PubMed Central journal article supplement (PMC7827807; doi:10.3390/foods10010112), 2021-01-07
Supplement: foods-10-00112-s001.pdf [file foods-10-00112-s001.pdf]

Figures Supplementary Material

Figure S1

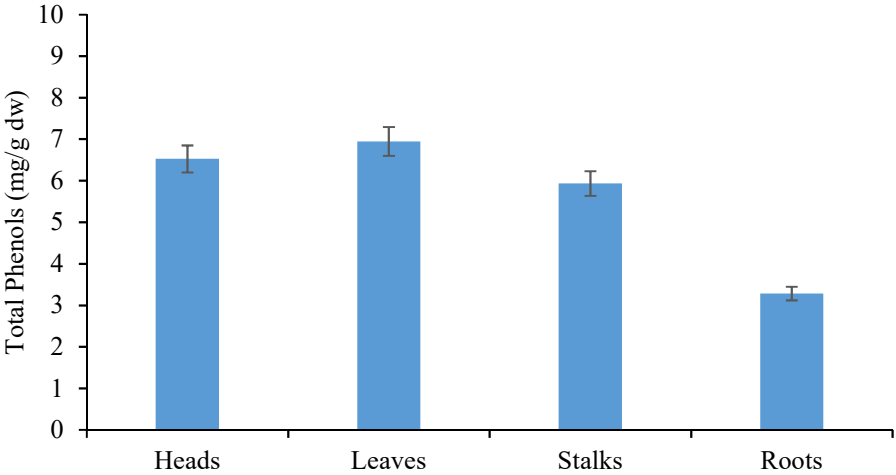

Figure S1. Total phenols yields ( $\text{mg g}^{-1} \text{ dw}$ ) achieved by MAE at selected best conditions (EtOH 25% V/V in water; 5 minutes; 50 °C)

**Figure S2.**

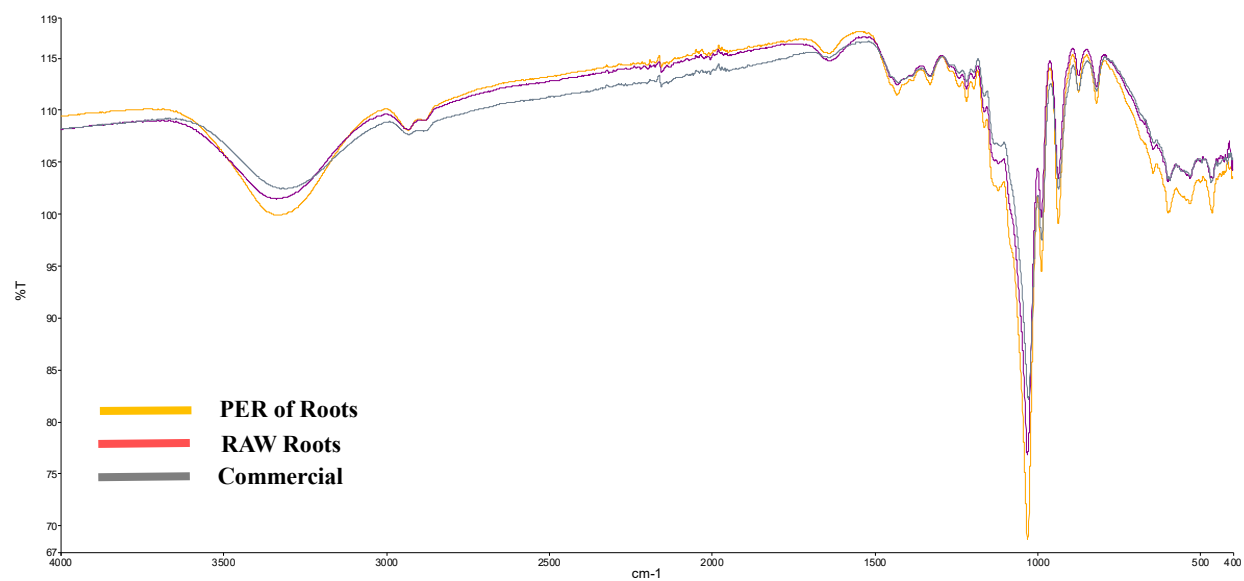

Figure S2. Infrared spectra (FT-IR ATR) of inulin extracted by MAE from raw roots (purple line) and PER of roots (yellow line) compared with commercial inulin (Sigma Aldrich) from chicory (grey line).

## Tables Supplementary Material

Table S1. Calibration curves and calculation of limit of detection (LOD) and limit of quantification (LOQ) values.

| Compound                              | Calibration Range (5 levels) | Slope of Calibration curve | Standard Deviation $\sigma$ | Limit of detection (LOD) = $3.3\sigma/S$ | Limit of quantitation (LOQ) = $10\sigma/S$ |
|---------------------------------------|------------------------------|----------------------------|-----------------------------|------------------------------------------|--------------------------------------------|
|                                       | ( $\mu\text{g/mL}$ )         |                            |                             | ( $\mu\text{g/mL}$ )                     | ( $\mu\text{g/mL}$ )                       |
| <i>Chlorogenic Acid</i>               | 5-250                        | 41670.0516                 | 56.5587                     | 0.0041                                   | 0.0136                                     |
| <i>Cynarin</i>                        | 5-250                        | 45865.2479                 | 38.3039                     | 0.0025                                   | 0.0084                                     |
| <i>Caffeic Acid</i>                   | 5-250                        | 102815.8158                | 213.9416                    | 0.0062                                   | 0.0208                                     |
| <i>Luteolin 7-O-glucoside</i>         | 0.5-25                       | 95473.7190                 | 113.0524                    | 0.0036                                   | 0.0118                                     |
| <i>Luteolin 7-O-glucoronide</i>       | 0.5-25                       | 98561.7391                 | 103.0524                    | 0.0031                                   | 0.0105                                     |
| <i>Trans Ferulic Acid</i>             | 5-250                        | 13879.2399                 | 55.4489                     | 0.0120                                   | 0.0400                                     |
| <i>1,5-di-O-Dicaffeoylquinic Acid</i> | 5-250                        | 45864.3967                 | 38.6466                     | 0.0025                                   | 0.0084                                     |
| <i>3,4-O Dicaffeoylquinic Acid</i>    | 5-250                        | 45863.4711                 | 38.5804                     | 0.0025                                   | 0.0084                                     |
| <i>Luteolin 7-O-rutinoside</i>        | 0.5-25                       | 95451.7419                 | 73.0524                     | 0.0023                                   | 0.0077                                     |
| <i>Apigenin 7-O-glucoside</i>         | 0.5-25                       | 95471.5868                 | 112.9977                    | 0.0036                                   | 0.0118                                     |
| <i>Quercetin</i>                      | 5-250                        | 184676.3168                | 171.9757                    | 0.0028                                   | 0.0093                                     |
| <i>Apigenin 7-O-glucoronide</i>       | 0.5-25                       | 97369.5828                 | 110.0362                    | 0.0034                                   | 0.0113                                     |
| <i>Apigenin 7-O-rutinoside</i>        | 0.5-25                       | 95593.6194                 | 108.0571                    | 0.0034                                   | 0.0113                                     |

Table S2. Database of Total Phenols yields achieved from artichoke plant residues (Heads, Leaves, Stalks and Roots) at different experimental extraction conditions.

|        | Time | Extraction condition | Water                   |       | EtOH 25%                |       | EtOH 50%                |       | EtOH 75%                |       |
|--------|------|----------------------|-------------------------|-------|-------------------------|-------|-------------------------|-------|-------------------------|-------|
|        |      |                      | TP                      | StDev | TP                      | StDev | TP                      | StDev | TP                      | StDev |
|        |      |                      | mean value<br>(mg/g dw) |       | mean value<br>(mg/g dw) |       | mean value<br>(mg/g dw) |       | mean value<br>(mg/g dw) |       |
| Heads  | 20'  | 25°C                 | 2.003                   | 0.200 | 3.529                   | 0.353 | 4.800                   | 0.480 | 4.088                   | 0.409 |
| Heads  | 8h   | 25°C                 | 0.306                   | 0.018 | 2.483                   | 0.149 | 4.944                   | 0.297 | 4.261                   | 0.256 |
| Heads  | 24h  | 25°C                 | 0.236                   | 0.017 | 1.168                   | 0.082 | 4.770                   | 0.334 | 4.088                   | 0.286 |
| Heads  | 48h  | 25°C                 | 0.145                   | 0.007 | 0.570                   | 0.029 | 4.481                   | 0.224 | 3.421                   | 0.171 |
| Heads  | 5'   | 50°C Mw              | 5.434                   | 0.272 | 6.523                   | 0.326 | 6.659                   | 0.333 | 6.830                   | 0.341 |
| Heads  | 10'  | 50°C Mw              | 4.446                   | 0.311 | 6.665                   | 0.467 | 6.771                   | 0.474 | 6.021                   | 0.421 |
| Heads  | 20'  | 50°C Mw              | 4.782                   | 0.383 | 6.768                   | 0.541 | 6.906                   | 0.552 | 7.061                   | 0.565 |
| Heads  | 5'   | 75°C Mw              | 3.653                   | 0.219 | 6.038                   | 0.362 | 6.209                   | 0.373 | 5.514                   | 0.331 |
| Heads  | 10'  | 75°C Mw              | 3.158                   | 0.316 | 5.801                   | 0.580 | 6.485                   | 0.649 | 5.624                   | 0.562 |
| Heads  | 20'  | 75°C Mw              | 2.589                   | 0.129 | 5.500                   | 0.275 | 5.918                   | 0.296 | 5.362                   | 0.268 |
| Heads  | 5'   | 100°C Mw             | 2.993                   | 0.120 | 6.231                   | 0.249 | 7.157                   | 0.286 | 5.949                   | 0.238 |
| Heads  | 10'  | 100°C Mw             | 4.095                   | 0.287 | 6.779                   | 0.475 | 7.202                   | 0.504 | 6.401                   | 0.448 |
| Heads  | 20'  | 100°C Mw             | 3.499                   | 0.175 | 6.436                   | 0.322 | 6.860                   | 0.343 | 5.806                   | 0.290 |
| Leaves | 20'  | 25°C                 | 0.695                   | 0.069 | 3.903                   | 0.390 | 4.349                   | 0.435 | 4.210                   | 0.421 |
| Leaves | 8h   | 25°C                 | 0.297                   | 0.018 | 2.125                   | 0.127 | 4.559                   | 0.274 | 3.671                   | 0.220 |
| Leaves | 24h  | 25°C                 | 0.184                   | 0.013 | 1.180                   | 0.083 | 4.371                   | 0.306 | 3.885                   | 0.272 |
| Leaves | 48h  | 25°C                 | 0.279                   | 0.014 | 0.779                   | 0.039 | 4.003                   | 0.200 | 3.676                   | 0.184 |
| Leaves | 5'   | 50°C Mw              | 4.291                   | 0.215 | 6.943                   | 0.347 | 6.332                   | 0.317 | 4.997                   | 0.250 |
| Leaves | 10'  | 50°C Mw              | 3.814                   | 0.267 | 6.380                   | 0.447 | 6.536                   | 0.457 | 5.636                   | 0.395 |
| Leaves | 20'  | 50°C Mw              | 3.534                   | 0.283 | 6.555                   | 0.524 | 7.187                   | 0.575 | 6.346                   | 0.508 |
| Leaves | 5'   | 75°C Mw              | 3.194                   | 0.192 | 7.028                   | 0.422 | 6.085                   | 0.365 | 5.232                   | 0.314 |
| Leaves | 10'  | 75°C Mw              | 2.956                   | 0.296 | 7.124                   | 0.712 | 6.739                   | 0.674 | 5.919                   | 0.592 |
| Leaves | 20'  | 75°C Mw              | 3.103                   | 0.155 | 6.665                   | 0.333 | 6.355                   | 0.318 | 5.876                   | 0.294 |
| Leaves | 5'   | 100°C Mw             | 3.650                   | 0.146 | 6.559                   | 0.262 | 7.144                   | 0.286 | 5.939                   | 0.238 |
| Leaves | 10'  | 100°C Mw             | 4.184                   | 0.293 | 6.658                   | 0.466 | 7.283                   | 0.510 | 6.328                   | 0.443 |

|        |     |          |       |       |       |       |       |       |       |       |
|--------|-----|----------|-------|-------|-------|-------|-------|-------|-------|-------|
| Leaves | 20' | 100°C Mw | 3.789 | 0.189 | 6.135 | 0.307 | 7.033 | 0.352 | 5.704 | 0.285 |
| Stalks | 20' | 25°C     | 3.191 | 0.319 | 3.838 | 0.384 | 4.185 | 0.418 | 3.599 | 0.360 |
| Stalks | 8h  | 25°C     | 2.018 | 0.121 | 3.478 | 0.209 | 4.333 | 0.260 | 3.413 | 0.205 |
| Stalks | 24h | 25°C     | 1.238 | 0.087 | 3.692 | 0.258 | 4.231 | 0.296 | 3.184 | 0.223 |
| Stalks | 48h | 25°C     | 0.796 | 0.040 | 3.660 | 0.183 | 4.111 | 0.206 | 3.337 | 0.167 |
| Stalks | 5'  | 50°C Mw  | 2.621 | 0.131 | 5.933 | 0.297 | 5.815 | 0.291 | 5.457 | 0.273 |
| Stalks | 10' | 50°C Mw  | 3.034 | 0.212 | 5.884 | 0.412 | 5.435 | 0.380 | 5.897 | 0.413 |
| Stalks | 20' | 50°C Mw  | 3.393 | 0.271 | 5.792 | 0.463 | 5.354 | 0.428 | 5.287 | 0.423 |
| Stalks | 5'  | 75°C Mw  | 2.342 | 0.141 | 6.368 | 0.382 | 5.096 | 0.306 | 5.521 | 0.331 |
| Stalks | 10' | 75°C Mw  | 3.071 | 0.307 | 6.792 | 0.679 | 5.930 | 0.593 | 5.646 | 0.565 |
| Stalks | 20' | 75°C Mw  | 3.275 | 0.164 | 5.904 | 0.295 | 6.914 | 0.346 | 6.050 | 0.302 |
| Stalks | 5'  | 100°C Mw | 2.629 | 0.105 | 6.779 | 0.271 | 6.084 | 0.243 | 6.255 | 0.250 |
| Stalks | 10' | 100°C Mw | 4.435 | 0.310 | 6.732 | 0.471 | 7.150 | 0.500 | 7.038 | 0.493 |
| Stalks | 20' | 100°C Mw | 3.886 | 0.194 | 4.518 | 0.226 | 6.363 | 0.318 | 6.259 | 0.313 |
| Roots  | 20' | 25°C     | 0.623 | 0.062 | 1.004 | 0.100 | 1.110 | 0.111 | 0.793 | 0.079 |
| Roots  | 8h  | 25°C     | 0.097 | 0.006 | 0.427 | 0.026 | 1.670 | 0.100 | 1.645 | 0.099 |
| Roots  | 24h | 25°C     | 0.026 | 0.002 | 0.060 | 0.004 | 1.307 | 0.091 | 1.871 | 0.131 |
| Roots  | 48h | 25°C     | 0.018 | 0.001 | 0.034 | 0.002 | 0.927 | 0.046 | 1.560 | 0.078 |
| Roots  | 5'  | 50°C Mw  | 1.344 | 0.067 | 3.283 | 0.164 | 2.660 | 0.133 | 3.031 | 0.152 |
| Roots  | 10' | 50°C Mw  | 1.752 | 0.123 | 2.470 | 0.173 | 2.918 | 0.204 | 2.818 | 0.197 |
| Roots  | 20' | 50°C Mw  | 1.022 | 0.082 | 2.871 | 0.230 | 3.036 | 0.243 | 2.322 | 0.186 |
| Roots  | 5'  | 75°C Mw  | 2.015 | 0.121 | 3.199 | 0.192 | 2.765 | 0.166 | 2.321 | 0.139 |
| Roots  | 10' | 75°C Mw  | 1.949 | 0.195 | 2.984 | 0.298 | 3.117 | 0.312 | 2.705 | 0.270 |
| Roots  | 20' | 75°C Mw  | 2.375 | 0.119 | 2.821 | 0.141 | 2.994 | 0.150 | 3.395 | 0.170 |
| Roots  | 5'  | 100°C Mw | 1.127 | 0.045 | 3.011 | 0.120 | 3.590 | 0.144 | 2.493 | 0.100 |
| Roots  | 10' | 100°C Mw | 2.100 | 0.147 | 3.712 | 0.260 | 4.391 | 0.307 | 3.717 | 0.260 |
| Roots  | 20' | 100°C Mw | 2.333 | 0.117 | 3.526 | 0.176 | 3.335 | 0.167 | 3.638 | 0.182 |
